# Supplementary material for: Manipulation of Viral MicroRNAs as a Potential Antiviral Strategy for the Treatment of Cytomegalovirus Infection
Source: Viruses. 2017 May 19;9(5):118. doi: 10.3390/v9050118 (PMC5454430; doi:10.3390/v9050118)
Supplement: Supplementary file 1 [file viruses-09-00118-s001.xlsx]

## Sheet: table
Group	No.	Organs	Amplification targets
			miR-m01-1	miR-m01-2-5p	miR-m01-2-3p	miR-m01-3-5p	miR-m01-3-3p	miR-m01-4-5p	miR-m01-4-3p	miR-m21-1	miR-m22-1	miR-M23-1-5p	miR-M23-1-3p	miR-M23-2-5p	miR-M23-2-3p	miR-M44-1	miR-M55-1	miR-m59-1	miR-m59-2	miR-M87-1	miR-m88-1-5p	miR-m88-1-3p	miR-M95-1-5p	miR-M95-1-3p	miR-m107-1-5p	miR-m107-1-3p	miR-m108-1-5p	miR-m108-1-3p	miR-m108-2-5p.1	miR-m108-2-5p.2	miR-m108-2-3p	U6§
Acute infection group	1001	liver	——	26.08	27.23	——	——	27.17	——	26.94	——	——	——	28.36	25.23	27.18	——	——	——	——	——	27.62	28.34	——	——	——	——	35.15	——	27.4	29.75	16.37
		lung	——	24.38	26.05	——	——	25.1	——	25.62	33.43	——	——	26.44	23.42	25.11	——	——	——	——	——	25.83	26.94	——	——	——	——	——	33.98	25.99	28.34	15.97
		blood	——	31.45	33.23	——	——	30.45	——	31.54	——	——	——	32.15	——	——	——	——	——	33.07	——	30.91	——	——	——	——	——	——	——	32.57	33.29
	1002	liver	——	25.4	27.09	——	——	26.53	——	26.44	32.51	——	——	27.91	24.64	26.03	——	——	——	——	——	26.93	27.7	——	——	——	——	——	——	26.63	——	15.42
		lung	——	26.05	27.61	——	——	27.11	——	27.41	31.39	——	——	28.12	25.47	27.17	——	——	——	——	——	27.12	28.6	——	——	——	——	——	——	——	29.87	15.94
		blood	——	32.17	32.61	——	——	31.11	——	32.18	——	——	——	30.91	——	——	——	——	——	——	——	31.19	——	——	35.1	——	——	——	——	35.03	——
	1003	liver	——	24.91	26.3	——	——	25.73	33.23	25.98	——	——	——	27.02	24.14	25.56	——	——	——	——	——	26.17	27.37	——	——	——	——	33.26	——	25.92	28.81	15.58
		lung	——	26.06	27.79	——	——	26.87	——	27.4	——	——	——	28.41	25.13	26.74	——	——	——	——	——	27.28	28.41	——	——	——	——	——	——	——	29.77	15.62
		blood	——	31.05	——	——	——	——	34.87	——	——	——	——	——	33.37	——	——	——	——	——	——	31.2	35.7	——	——	34.34	——	34.74	——	32.11	34.99
	1004	liver	——	29.17	30.6	——	——	30.24	——	30.44	——	——	——	31.48	28.21	29.82	31.95	——	34.11	——	——	30.79	31.87	——	34.18	——	——	——	——	——	——	15.73
		lung	——	30.54	31.88	31.56	——	31.58	——	31.51	——	32.37	——	32.88	29.87	——	——	——	——	32.93	——	31.68	33.09	31.25	——	——	——	——	——	31.96	34.53	16.18
		blood	——	33.18	——	32.47	——	——	——	——	34.22	——	——	——	——	——	——	33.3	——	——	——	——	——	——	——	——	——	——	——	——	——
	1005	liver	——	25.61	27.24	——	——	26.71	35.91	26.48	33.08	32.57	——	28.07	24.93	26.4	——	——	——	——	——	27.23	27.96	——	——	——	——	——	35.29	26.76	29.61	16.1
		lung	——	24.5	26.14	——	——	25.46	——	25.58	31.34	——	——	26.62	23.53	25.23	——	——	——	——	——	25.67	27.01	——	——	——	——	——	——	25.67	28.6	16.08
		blood	——	31.87	33.3	——	——	32.33	36.11	31.96	——	——	34.87	——	——	——	——	——	——	——	——	32.93	35.91	——	——	——	——	——	——	——	——
	1006	liver	——	24.65	26.23	——	——	25.74	——	25.45	——	——	——	27.12	23.88	25.58	——	——	——	——	——	25.83	27.25	——	——	——	——	——	——	25.88	28.38	15.09
		lung	——	27.25	28.61	——	——	28.03	——	28.17	——	——	——	29.54	26.55	27.95	——	——	——	——	——	28.48	29.8	——	——	——	——	——	33.34	28.79	31.09	15.88
		blood	——	31.5	——	——	——	32.43	——	32.71	——	——	——	31.1	33.07	——	——	——	——	——	——	——	——	——	——	32.93	——	——	——	31.69	33.54
	1007	liver	——	25.54	26.97	——	——	26.55	——	26.49	——	——	——	27.91	24.84	26.25	——	——	——	——	——	26.87	28.23	——	34.05	——	——	——	——	27.2	29.43	15.91
		lung	——	25.63	27.02	——	——	26.72	——	26.97	——	——	——	27.92	24.8	26.56	——	——	——	——	——	26.75	28.25	——	——	——	——	35.59	——	27.12	29.57	15.26
		blood	——	32.48	——	——	——	35.53	——	33.07	36.41	——	——	30.3	33.03	32.74	——	——	——	——	——	——	——	——	——	——	——	——	——	——	32.87
	1008	liver	——	28.39	29.99	——	——	29.2	——	29.35	35.21	——	——	30.7	27.58	29.3	——	——	33.77	——	——	29.51	31.12	——	33.5	——	——	——	——	30.11	——	15.93
		lung	——	30.65	32.29	31.14	——	31.6	——	31.73	——	——	——	32.76	29.92	——	34.21	——	——	——	——	31.91	33.17	——	——	——	——	35.17	34.72	31.83	34.3	16.3
		blood	——	31.92	——	——	——	——	36.44	——	——	——	——	——	——	——	——	——	——	——	——	——	——	——	——	——	——	——	33.33	36.54	——
	1009	liver	——	23.17	24.31	——	——	23.8	——	23.97	——	——	——	25.34	22.52	24.25	——	——	——	——	——	24.78	25.7	——	——	——	35.15	——	——	24.75	27.13	15.4
		lung	——	23.02	24.51	——	——	23.81	——	24.03	——	——	——	24.98	22.14	23.69	——	——	——	——	——	24.27	25.31	——	——	35.17	——	——	——	——	27.11	15.96
		blood	——	31.39	——	——	——	——	——	——	——	——	——	——	33.24	——	——	——	——	——	——	31.03	——	——	——	34.65	——	33.82	——	——	——
	1010	liver	——	26.07	27.24	——	——	26.68	——	27.12	32.91	——	——	28.12	25.31	27.12	——	——	——	——	——	27.2	28.77	——	——	——	——	——	——	——	30.11	16.2
		lung	——	25.24	26.83	——	——	25.84	——	26.5	——	——	——	27.45	24.38	25.82	——	——	——	——	——	26.69	27.86	——	——	——	——	——	——	——	28.96	15.58
		blood	——	32.71	——	——	——	31.86	——	——	——	——	——	——	31.89	——	——	——	——	——	——	32.58	——	——	——	——	——	33.62	——	31.28	33.55
	1011	liver	——	28.22	29.4	——	——	29.23	31.71	29.3	——	——	——	——	27.62	29	——	——	32.45	——	——	29.53	30.68	——	——	——	——	——	33.55	29.75	32.26	16.13
		lung	——	27.66	29.26	——	——	28.52	——	28.59	——	——	——	29.77	26.71	28.69	——	——	——	32.64	——	28.86	30.15	——	——	——	——	——	——	29.1	31.69	15.85
		blood	——	34.41	——	——	——	33.68	——	——	——	——	——	31.22	32.61	——	——	——	——	——	——	31.52	——	——	——	——	——	——	——	33.19	——
	1012	liver	——	31.5	33.23	——	——	32.52	——	32.7	33.42	33.12	——	33.98	30.58	32.1	——	——	——	——	——	32.97	33.82	——	——	——	34.54	——	——	——	35.61	15.88
		lung	——	32.09	33.79	35.38	——	33.22	——	33.4	——	——	——	34.5	31.33	——	——	——	——	——	——	33.27	34.48	——	——	——	——	——	——	33.8	36	15.76
		blood	——	32.07	——	——	——	——	——	——	34.55	——	——	31.02	33.74	——	——	——	——	——	——	——	——	——	——	——	——	——	——	31.28	——
	1013	liver	——	20.16	21.82	——	——	21.01	——	20.98	——	——	——	22.18	19.25	20.7	——	——	——	——	——	21.35	22.54	——	——	——	——	33.82	——	21.67	23.91	15.69
		lung	——	22.46	24.08	——	——	23.19	——	23.43	——	——	——	24.97	21.79	23.26	——	——	——	——	——	23.77	24.85	——	——	——	——	——	——	23.86	26.16	15.99
		blood	——	30.24	——	——	——	31.45	35.27	——	——	——	——	——	34.01	34.02	——	——	——	——	——	——	——	——	——	——	——	——	——	31.27	——
	1014	liver	——	24.77	26.35	——	——	25.65	——	25.67	32.22	——	——	27.05	23.96	25.41	——	——	——	——	——	26.23	27.16	——	——	——	33.06	——	——	26.11	28.47	15.36
		lung	——	25.21	26.4	——	——	26.14	——	26.53	——	——	——	27.56	24.55	26.01	——	——	——	——	——	26.75	27.84	——	——	——	——	——	——	——	29.14	15.63
		blood	——	30.77	——	——	——	32.17	——	——	——	——	——	32	——	——	——	——	——	——	——	——	36.06	——	——	——	——	35.7	——	33.59	33.5
	1015	liver	——	26.06	27.44	——	——	27.04	——	26.86	——	——	——	28.23	25.09	26.74	——	——	——	——	32.17	27.39	28.61	——	——	——	——	——	——	27.43	29.77	15.72
		lung	——	26.95	28.23	——	32.34	27.86	——	28.05	——	——	——	29.01	26.33	27.83	——	——	——	——	——	28.06	29.37	30.9	——	——	——	——	——	——	30.71	16.13
		blood	——	32.07	——	——	——	——	——	31.77	——	——	——	31	——	——	——	——	——	——	——	32.24	——	——	——	——	——	——	——	——	31.28
Viral reactivation group	2001	liver	——	31.1	32.79	——	——	32.01	——	32.58	——	35.37	——	——	30.49	32.09	——	——	——	——	——	32.51	34.38	——	——	——	——	——	——	33.07	35.22	14.12
		lung	——	31.2	32.96	——	——	32.3	——	32.34	——	——	——	33.22	——	32.33	——	——	32	——	31.03	32.34	33.53	——	——	——	34.66	——	——	32.13	34.8	16.32
		blood	——	33.2	——	——	——	——	——	——	——	32.17	——	32.97	——	31.85	——	——	——	——	——	33.18	——	——	——	——	——	——	——	——	36.41
	2002	liver	——	30.16	32	——	——	31.15	——	31.28	36.6	——	——	32.69	29.21	31.16	——	——	——	——	——	31.64	32.58	——	——	——	——	——	——	31.34	33.98	15.31
		lung	——	27.12	28.41	——	——	28.01	——	28.5	33.34	——	——	29.28	26.55	28.12	——	——	——	——	——	28.88	29.8	——	——	——	——	——	——	29.05	31.36	15.61
		blood	——	33.12	——	——	——	35.67	——	——	——	——	——	34.27	32.8	——	——	——	——	——	——	31.36	35.53	31.82	——	——	——	——	——	35.6	34.73
	2003	liver	——	31.31	32.75	——	——	32.59	33.2	32.27	——	——	——	33.78	30.86	32.92	——	——	——	——	——	33.37	33.89	——	——	——	——	34.45	——	33.13	35.53	16.45
		lung	——	26.1	27.9	——	——	27.1	——	27.76	32.25	——	——	——	25.71	26.83	——	——	——	——	——	27.61	28.74	——	——	——	——	35.67	——	28.04	30.33	16.07
		blood	——	34.45	35.9	——	——	33.01	36.01	33.36	36.52	——	——	——	32.69	31.98	——	——	——	——	——	——	——	——	——	——	——	——	——	35.08	35.52
	2004	liver	——	30.44	31.95	——	——	31.07	——	31.28	——	——	——	——	29.38	31.21	——	——	——	——	——	31.57	32.76	——	——	——	——	——	——	31.61	34.54	15.77
		lung	——	28.86	——	——	——	28.75	——	29.15	——	——	——	30.59	27.26	28.47	——	——	——	——	——	29.32	30.2	——	——	——	——	——	——	29.24	31.76	15.55
		blood	——	30.35	——	——	——	34.42	34.03	31.74	——	——	——	33.63	34.24	——	——	——	——	——	——	31.66	34.53	——	——	——	——	——	——	34.11	35.65
	2005†	liver
		lung
		blood
	2006	liver	——	31.41	32.98	——	——	32.48	——	32.32	33.42	——	——	33.88	30.48	31.85	——	——	——	——	——	32.78	33.73	——	——	——	——	——	——	32.61	34.92	16.28
		lung	——	29.4	30.35	——	——	29.72	——	30.19	——	——	——	30.45	28.11	29.62	——	——	——	——	33.1	29.58	31.35	——	——	——	——	——	——	——	32.27	15.96
		blood	——	31.84	——	——	——	——	——	31.3	——	——	——	34.15	——	——	——	——	——	——	——	32.29	34.23	——	——	——	——	——	——	36.46	34.21
	2007	liver	——	29.97	31.72	——	——	31.04	——	30.94	——	——	——	32.35	29.12	31.38	——	——	——	——	——	31.38	33.03	——	——	——	——	——	——	31.65	33.88	16.12
		lung	——	29.1	30.84	——	——	30	——	30.24	——	——	——	31.72	——	29.66	——	——	——	——	——	30.42	31.87	——	——	——	——	——	——	30.58	32.81	15.62
		blood	——	33.47	——	——	——	——	——	35.9	——	——	——	——	——	——	——	——	——	——	——	33.01	——	——	——	——	——	34.15	——	33.15	34.49
	2008	liver	——	31.68	33.22	——	——	32.29	——	32.53	——	——	——	——	30.36	31.99	——	——	——	——	——	32.9	33.95	——	——	——	——	——	——	32.72	35.45	15.65
		lung	——	29.68	30.03	——	——	30.05	——	29.77	32.89	——	——	30.72	28.37	29.58	——	——	——	——	——	30.24	31.14	——	——	——	——	——	——	30.71	32.6	15.49
		blood	——	31.89	——	——	36.67	36.12	——	31.72	——	——	——	——	——	32.21	——	——	——	——	——	31.97	——	——	——	——	——	——	——	35.69	33.81
	2009	liver	——	31.84	32.98	——	——	32.41	——	32.48	——	——	——	33.64	30.78	32.7	——	——	——	——	——	32.96	34.4	——	——	——	——	——	——	33.23	35.57	16.14
		lung	——	27.05	28.55	——	——	27.58	——	28.69	——	——	34.63	29.46	26.15	27.83	——	——	——	——	——	28.55	29.79	——	——	——	——	——	——	28.72	30.66	15.78
		blood	——	33.31	——	——	——	——	——	——	——	——	——	31.96	32.72	——	——	——	——	——	——	33.16	35.82	——	——	——	——	——	——	——	33.86
	2010	liver	——	34.05	35.43	——	——	35.18	33.33	35.13	——	——	——	——	33.35	34.74	——	——	——	——	——	35.74	36.64	——	——	——	——	——	——	36.03	36.41	16.05
		lung	——	30.22	31.51	——	——	31.08	——	30.99	——	——	——	32.5	29.16	——	——	——	33.93	——	——	31.53	32.84	——	——	——	——	——	——	——	34.22	15.77
		blood	——	33.09	——	——	——	——	——	——	35.57	——	——	——	33.08	——	32.14	——	——	——	——	——	——	——	——	——	——	——	——	——	——
	2011†	liver
		lung
		blood
	2012‡	liver
		lung
		blood
	2013	liver	——	30.41	31.33	——	——	30.67	——	31.27	——	——	——	32.28	29.25	31.51	——	——	——	——	——	31.89	32.99	——	——	——	——	——	——	31.47	34.1	15.07
		lung	——	26.72	27.87	——	——	27.28	——	27.42	——	——	——	28.56	25.93	27.02	——	——	——	——	——	27.47	28.6	——	——	——	——	——	——	27.9	30.65	16.02
		blood	——	31.9	——	——	——	35.9	——	31.56	——	——	——	32.28	33.33	——	——	——	——	——	——	32.15	——	——	——	——	——	——	——	33.57	34.71
	2014	liver	——	30.51	32.23	——	——	31.66	——	31.65	——	——	——	32.68	29.43	31.4	——	——	——	——	——	32.57	33.46	——	——	——	——	——	——	32.38	34.29	15.15
		lung	——	28.8	29.88	——	——	29.69	——	29.71	——	——	——	——	27.81	29.23	——	——	——	——	——	29.48	31.33	——	——	——	34.37	——	——	——	32.77	15.58
		blood	——	——	——	——	——	——	——	36.86	——	——	——	——	31.75	——	——	——	31.84	——	——	——	——	——	——	——	——	——	——	34.01	34.11
	2015‡	liver
		lung
		blood
	2016‡	liver
		lung
		blood
	2017	liver	——	28.78	30.34	——	——	29.28	——	29.49	——	——	——	30.56	27.68	29.4	——	——	——	——	——	29.61	30.94	——	——	——	——	——	——	30.22	32.49	15.68
		lung	——	27.26	29.12	——	——	28.21	——	28.36	——	——	——	29.95	26.97	28.34	——	——	——	——	——	28.88	29.81	——	——	——	——	——	——	——	30.88	15.98
		blood	——	——	——	——	——	35.95	——	32.03	——	——	——	——	33.9	——	——	——	——	——	——	32.59	35.3	——	——	——	——	——	——	——	33.91
	2018†	liver
		lung
		blood
	2019	liver	——	30.85	31.99	——	——	31.97	——	32.17	——	——	——	32.71	29.99	31.45	——	——	——	——	——	32.17	33.2	——	——	——	——	——	——	32.52	34.73	15.87
		lung	——	28.72	30	——	——	29.41	——	29.7	——	——	——	30.95	27.72	——	——	——	——	——	——	29.73	31.32	——	——	——	——	——	——	29.87	32.26	15.96
		blood	——	34.16	——	——	——	——	——	33.03	——	——	——	33.49	33.74	——	——	——	——	——	——	31.72	36.7	——	——	——	——	——	——	36.6	35.03
	2020	liver	——	31.02	32.35	——	——	32.24	35.54	31.75	——	——	——	33.57	30.36	31.8	——	——	——	——	——	32.51	33.63	——	——	——	33.36	——	——	32.61	35.2	16.05
		lung	——	27.57	——	——	——	28.95	——	28.9	——	——	——	30.12	26.9	28.38	——	——	34.03	——	——	28.5	30.33	30.99	——	——	——	——	——	——	31.43	15
		blood	——	32.98	——	——	——	36.19	——	——	——	——	——	——	33.02	——	——	——	——	——	——	31.68	——	——	——	——	——	——	——	35.73	34
	2021	liver	——	30.71	32.97	——	——	32.1	——	32.33	32.44	——	——	33.57	30.17	31.39	——	——	——	——	——	32.26	33.19	——	——	——	——	——	——	32.15	35.38	15.85
		lung	——	28.1	30	——	——	29.5	——	29.32	——	——	——	30.78	27.59	29.01	——	——	——	——	——	29.47	30.31	——	——	——	——	——	——	30.1	31.85	15.42
		blood	——	32.9	——	——	——	——	——	——	——	——	——	34.21	33.12	——	——	——	——	——	——	33.09	36.28	——	——	——	——	——	——	35.19	36.73
	2022†	liver
		lung
		blood
	2023	liver	——	36.01	37.48	——	——	36.94	——	36.78	——	32	——	——	35.67	36.65	——	32.82	——	——	——	37.87	38.27	——	——	——	34.54	——	——	37.5	36.89	16.32
		lung	——	31.3	——	——	——	32.62	——	32.58	——	——	33.37	33.48	——	——	——	——	——	——	31.6	32.39	33.92	31.39	——	——	——	——	——	32.82	35.76	15.97
		blood	——	33.29	——	——	——	——	32.85	——	——	——	——	31.87	32.15	33.51	33.33	——	——	——	——	——	——	32.36	34.26	——	——	——	——	——	——
	2024†	liver
		lung
		blood
	2025†	liver
		lung
		blood
	2026†	liver
		lung
		blood
	2027	liver	——	30.07	31.59	——	——	31.51	——	30.88	——	33.14	——	32.41	29.15	31.13	——	35.75	——	——	——	31.44	32.8	——	——	——	——	——	——	31.1	34.07	15.34
		lung	——	29.18	30.44	——	——	30.05	——	30.09	——	——	——	——	28.84	29.7	——	——	——	——	——	30.66	31.94	——	——	——	——	——	——	30.72	33.26	15.89
		blood	——	35.5	——	——	——	——	——	——	——	——	——	——	32.58	——	——	——	——	——	——	——	——	——	——	——	——	——	——	——	36.69
—— indicates not detected.
† The mouse was dead during the experiment.
‡ The MCMV maintained latency in the mouse by the end of observation period.
§ For miRNAs in blood, U6 value wasn't measured by qPCR
